# Supplementary material for: Adult astrocytes from reptiles are resistant to proinflammatory activation via sustaining Vav1 expression
Source: PubMed Central journal article supplement — J Biol Chem. 2021 Mar 9;296:100527. doi: 10.1016/j.jbc.2021.100527 (PMC8065226; doi:10.1016/j.jbc.2021.100527), 2021-03-09
Supplement: mmc5.pdf [file mmc5.pdf]

Adult astrocytes from reptiles are resistant to proinflammatory activation *via* sustaining Vav1 expression

Nan Du, Hui Li, Chunshuai Sun, Bingqiang He, Ting Yang, Honghua Song, Yingjie Wang\*, Yongjun Wang\*

Key Laboratory of Neuroregeneration of Jiangsu and Ministry of Education, Co-innovation Center of Neuroregeneration, Nantong University, Nantong, PR China

Running title: Reptile astrocytes are resistant to inflammatory activation

\*Correspondence: Key Laboratory of Neuroregeneration, Nantong University, Nantong 226001, P.R. China. Email: wyjbs@ntu.edu.cn; or Key Laboratory of Neuroregeneration, Nantong University, Nantong 226001, P.R. China. Email: wyj2010@ntu.edu.cn

Content: Fig. S1, Fig. S2, TableS1, TableS2, TableS3, TableS4

FigureS1

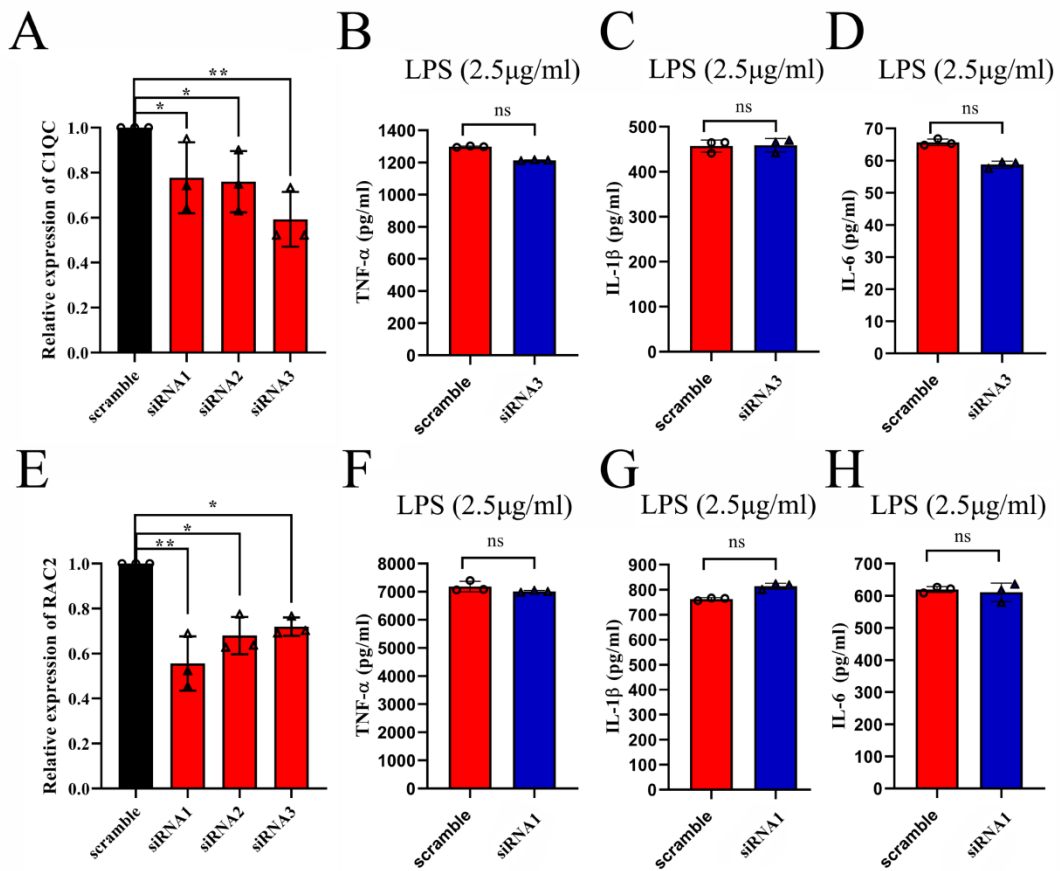

**FigureS1. Effects of C1QC and RAC2 on LPS-mediated inflammation in gAS.** A) Interference efficiency of three siRNA oligonucleotides for gecko C1QC was measured by RT-PCR, and siRNA3 was used for the knockdown experiments. B-D) ELISA assay of TNF- $\alpha$  (B), IL-1 $\beta$  (C) and IL-6 (D) production in the gAS following siRNA3 knockdown for 24 h, then treatment with 2.5  $\mu$ g/ml LPS for 24 h. E) Interference efficiency of three siRNA oligonucleotides for gecko RAC2 was measured by RT-PCR, and siRNA1 was used for the knockdown experiments. F-H) ELISA assay of TNF- $\alpha$  (B), IL-1 $\beta$  (C) and IL-6 (D) production in the gAS following siRNA1 knockdown for 24 h, then treatment with 2.5  $\mu$ g/ml LPS for 24 h. Experiments were performed in triplicates. Error bars represent the standard deviation ( $P < 0.05$ ).

FigureS2

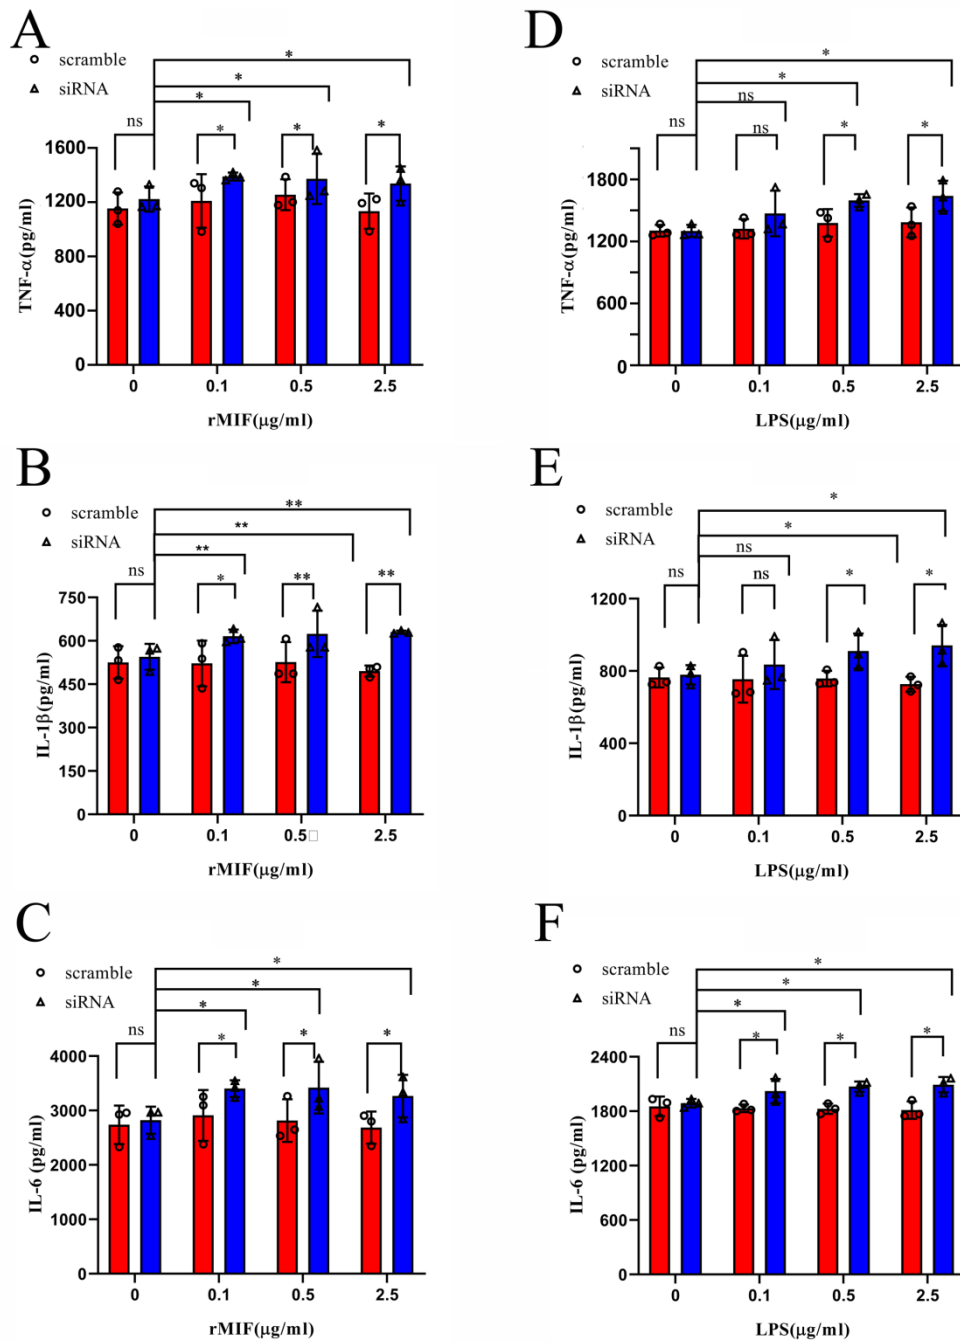

**FigureS2. Effects of Vav1 interference on the inflammatory activation of gAS stimulated by rMIF and LPS.** A-C) ELISA assay of TNF- $\alpha$  (A), IL-1 $\beta$  (B) and IL-6 (C) production in the gAS following Vav1 siRNA3 knockdown for 24 h, then treatment with different concentration of rMIF for 24 h. D-F) ELISA assay of the cytokines following the cell treatment with different concentration of LPS for 24 h. Experiments were performed in triplicates. Error bars represent the standard deviation (P < 0.05).

TableS1 Comparison of gene expression among gAS, eAS and rAS

TableS2 DEGs in gAS following stimulation with 2.5 µg/ml gMIF for 12 h and 24 h

TableS3 DEGs in rAS challenged by rMIF for 12 h and 24 h

TableS4 Inflammation-related genes integrated from genes with unaltered expression in gAS after gMIF stimulation and the DEGs of rAS challenged by rMIF
